# Supplementary material for: Removal of Acidic Organic Ionic Dyes from Water by Electrospinning a Polyacrylonitrile Composite MIL101(Fe)-NH2 Nanofiber Membrane
Source: MDPI journal article supplement (doi:10.3390/molecules27062035), 2022-03-21
Supplement: s1 [file s1]

Supplementary Materials

# Removal of acidic organic ionic dyes from water by electrospinning a polyacrylonitrile composite MIL101(Fe)-NH<sub>2</sub> nanofiber membrane

Jiao Jia, Hao Wu, Le Xu, Fengchun Dong, Yongtang Jia\* and Xi Liu\*

Guangdong-Hong Kong Joint Laboratory for New Textile Materials, Guangdong Functional Fiber and Textile Engineering Technology Research Center, School of Textile Materials and Engineering, Wuyi University, Jiangmen 529020, China

\*Correspondence: yongtjh@163.com; [liuxi\\_wyu@163.com](mailto:liuxi_wyu@163.com) or [liuxi@wyu.edu.cn](mailto:liuxi@wyu.edu.cn)

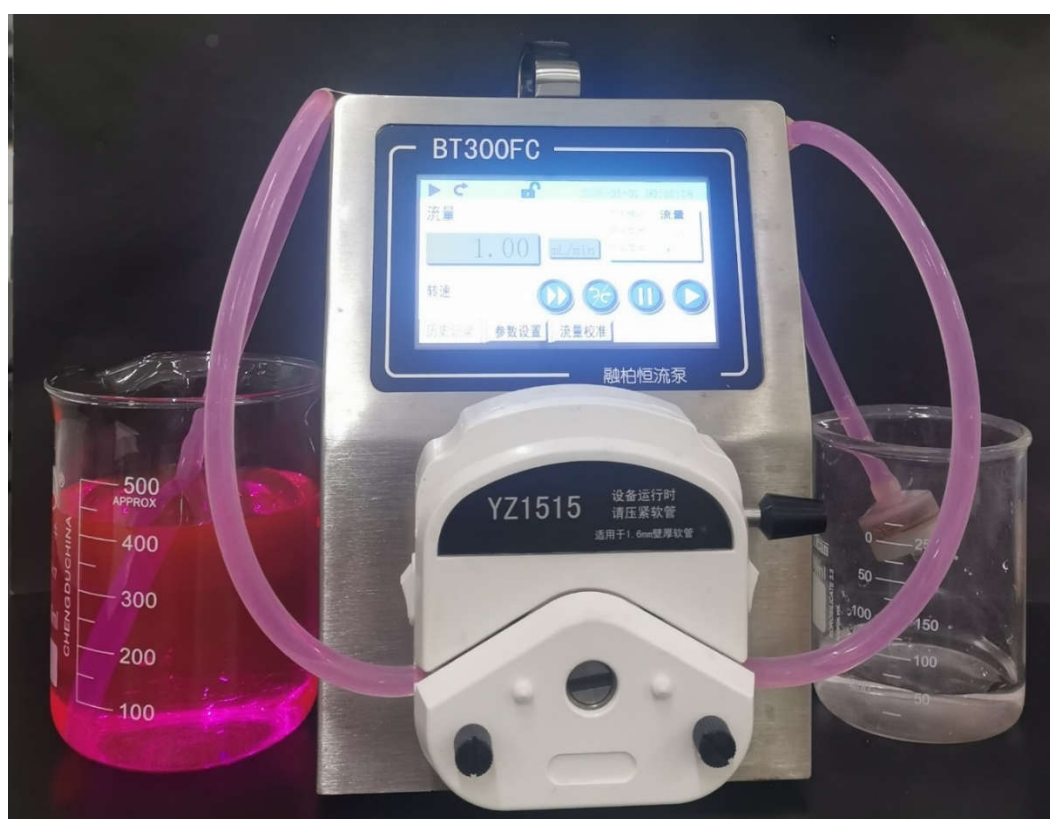

**Figure S1:** Schematic diagram of adsorption device.

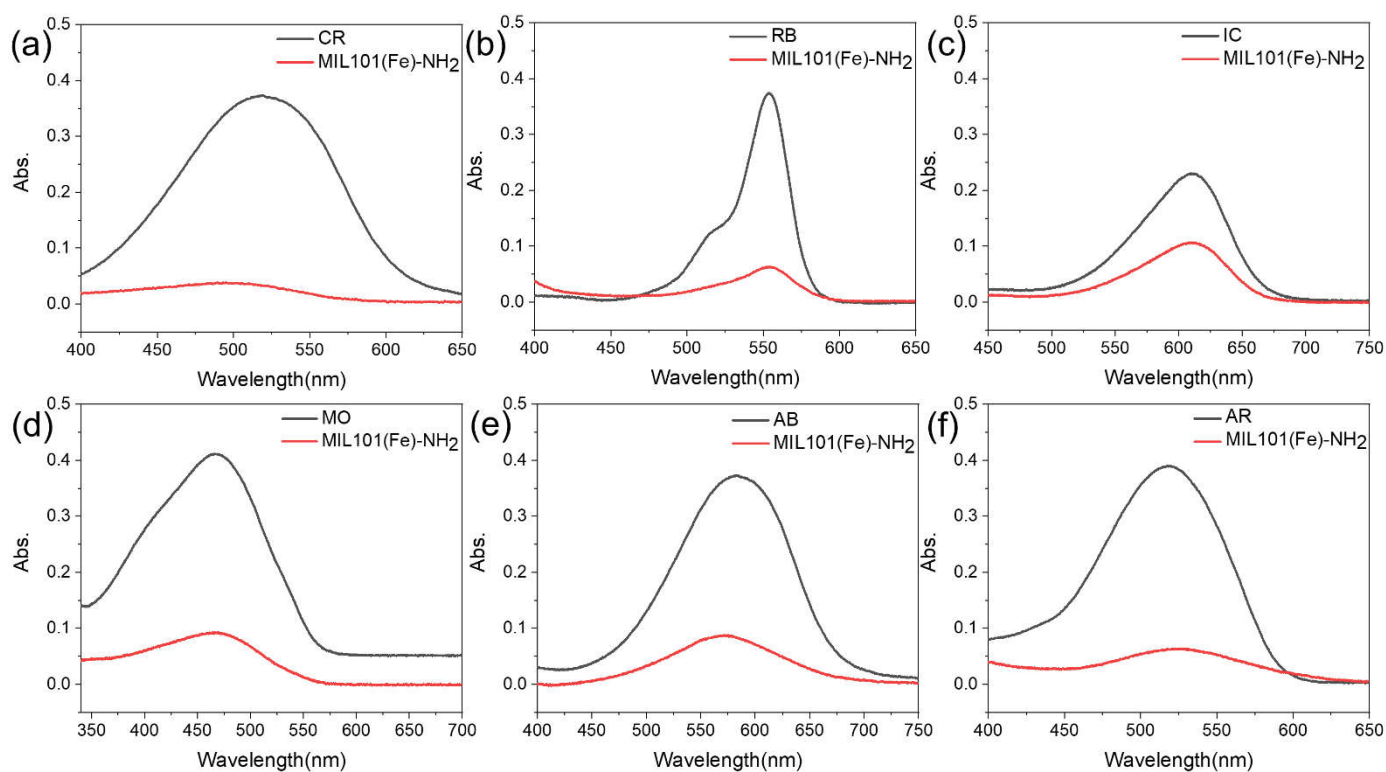

**Figure S2:** Removal effect of MIL101(Fe)-NH<sub>2</sub> powder for congo red(a), rhodamine B(b), indigo carmine(c), methyl orange(d), acid blue 93(e) and acid red 27(f).

The removal efficiencies of MIL101(Fe)-NH<sub>2</sub> powder on congo red, rhodamine B, indigo carmine, methyl orange, acid blue 93 and acid red 27 were 91.36%, 83.21%, 53.98, 77.51%, 76.73% and 98.41%, respectively. However, after combining MIL101(Fe)-NH<sub>2</sub> powder with PAN, Due to the synergistic effect of MIL101(Fe)-NH<sub>2</sub> powder and PAN, MIL101(Fe)-NH<sub>2</sub> powder was evenly distributed on the surface of PAN nanofibers, increasing the contact area with dye solution during the adsorption process, thus increasing the adsorption performance of dyes.

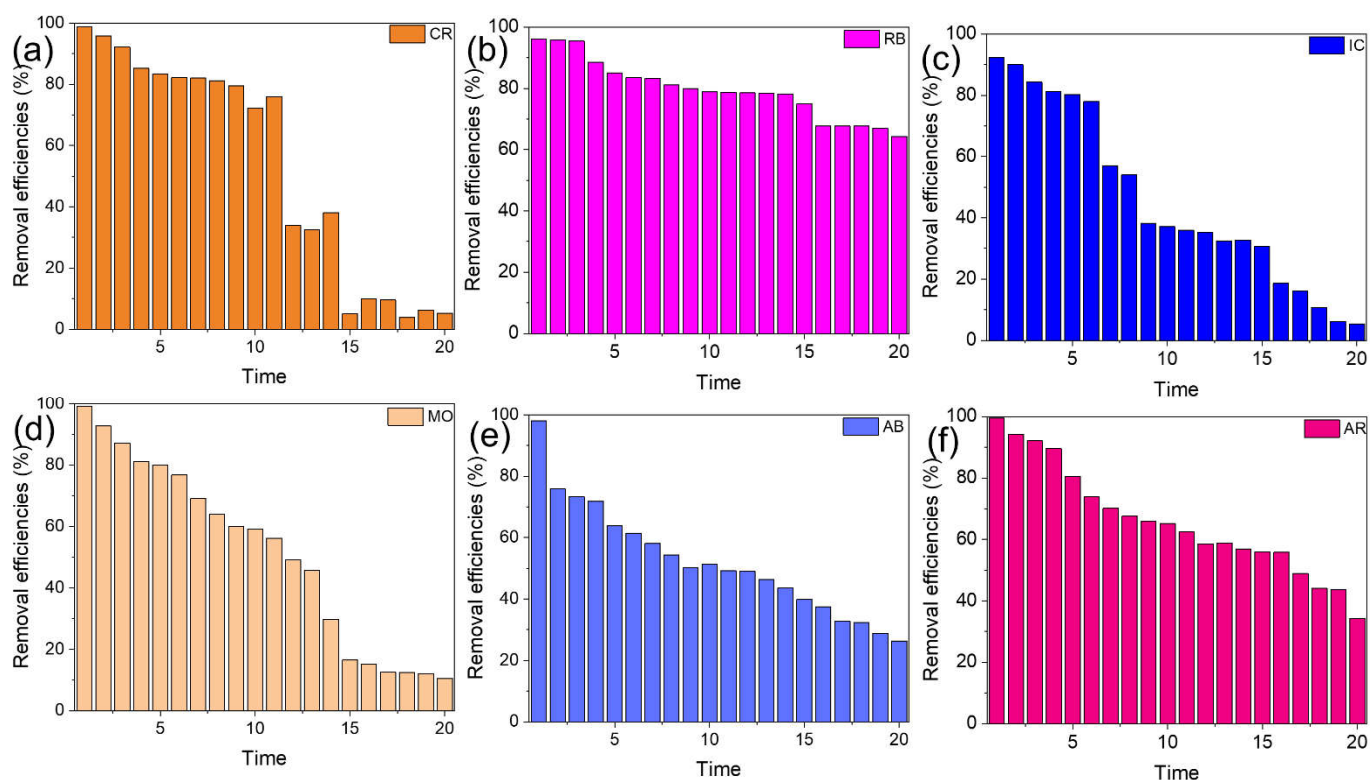

**Figure S3:** Long-term removal efficiencies of PAN-MIL101(Fe)-NH<sub>2</sub> for congo red(a), rhodamine B(b), indigo carmine(c), methyl orange(d), acid blue 93(e) and acid red 27(f).

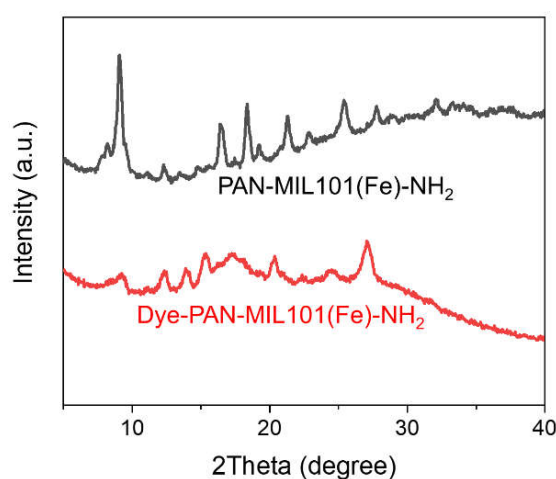

**Figure S4:** XRD spectra of PAN-MIL101(Fe)-NH<sub>2</sub> comparison before and after dye adsorption

XRD tests were carried out on PAN-MIL101(Fe)-NH<sub>2</sub> composite nanofiber membrane before and after dye adsorption. The test results showed that the crystallinity of PAN-MIL101(Fe)-NH<sub>2</sub> composite nanofiber membrane after dye adsorption decreased to a certain extent, which may be attributed to the large content of dye molecules in the NFM and the diffraction signals of MIL101(Fe)-NH<sub>2</sub> MOF interfered.

**Table S1:** Removal efficiencies of congo Red, rhodamine B, indigo carmine, methyl orange, acid blue 93 and acid red 27 by PAN, PAN-MIL101(Fe)-NH<sub>2</sub>, and MIL101(Fe)-NH<sub>2</sub> powder.

|                                   | Dye name            | A <sub>t</sub> | A <sub>0</sub> | Removal efficiency(%) |
|-----------------------------------|---------------------|----------------|----------------|-----------------------|
| PAN                               | Congo Red (CR)      | 0.3483         | 0.3790         | 8.01                  |
|                                   | Rhodamine B (RB)    | 0.2366         | 0.3001         | 21.13                 |
|                                   | Indigo Carmine (IC) | 0.2201         | 0.2399         | 8.24                  |
|                                   | Methyl orange (MO)  | 0.3814         | 0.4114         | 7.28                  |
|                                   | Acid Blue 93 (AB)   | 0.3567         | 0.3734         | 4.47                  |
|                                   | Acid Red 27 (AR)    | 0.3471         | 0.4198         | 17.31                 |
| PAN-MIL101(Fe)-NH <sub>2</sub>    | Congo Red (CR)      | 0.0047         | 0.3790         | 98.76                 |
|                                   | Rhodamine B (RB)    | 0.0119         | 0.3001         | 96.03                 |
|                                   | Indigo Carmine (IC) | 0.0184         | 0.2399         | 92.35                 |
|                                   | Methyl orange (MO)  | 0.0036         | 0.4114         | 99.12                 |
|                                   | Acid Blue 93 (AB)   | 0.0074         | 0.3734         | 98.02                 |
|                                   | Acid Red 27 (AR)    | 0.0020         | 0.4198         | 99.52                 |
| MIL101(Fe)-NH <sub>2</sub> powder | Congo Red (CR)      | 0.03209        | 0.3715         | 91.36                 |
|                                   | Rhodamine B (RB)    | 0.0626         | 0.3729         | 83.21                 |
|                                   | Indigo Carmine (IC) | 0.1056         | 0.2295         | 53.98                 |
|                                   | Methyl orange (MO)  | 0.0915         | 0.4069         | 77.51                 |
|                                   | Acid Blue 93 (AB)   | 0.0844         | 0.3628         | 76.73                 |
|                                   | Acid Red 27 (AR)    | 0.0062         | 0.3902         | 98.41                 |

**Table S2:** Maximum loading weights of PAN-MIL101(Fe)-NH<sub>2</sub> on congo Red, rhodamine B, indigo carmine, methyl orange, acid blue 93 and acid red 27.

| Dye                 | PAN-MIL101(Fe)-NH <sub>2</sub> (g) | C <sub>e</sub> (mg/L) | Cycling Times | Maximum loading (mg/g) |
|---------------------|------------------------------------|-----------------------|---------------|------------------------|
| Congo Red (CR)      | 0.038                              | 7.587                 | 12            | 199.66                 |
| Rhodamine B (RB)    | 0.024                              | 8                     | 12            | 333.33                 |
| Indigo Carmine (IC) | 0.031                              | 7.79                  | 6             | 259.66                 |
| Methyl orange (MO)  | 0.028                              | 5.617                 | 11            | 200.61                 |
| Acid Blue 93 (AB)   | 0.026                              | 5.19                  | 10            | 199.62                 |
| Acid Red 27 (AR)    | 0.024                              | 6.51                  | 10            | 271.25                 |
